# Supplementary material for: Canonical MicroRNA Activity Facilitates but May Be Dispensable for Transcription Factor-Mediated Reprogramming
Source: PubMed Central journal article supplement (PMC4682342; doi:10.1016/j.stemcr.2015.11.002), 2015-12-08
Supplement: mmc1.pdf [file mmc1.pdf]

Stem Cell Reports, Volume 5

Supplemental Information

**Canonical MicroRNA Activity Facilitates but May Be  
Dispensable for Transcription Factor-Mediated  
Reprogramming**

Zhong Liu, Maria Skamagki, Kitai Kim, and Rui Zhao

## EXTENDED FIGURE LEGEND

**Figure S1.** Schematic of the canonical miRNA, endo-shRNA, mirtron, and endo-siRNA biogenesis pathways, related to Figure 1-5.

**Figure S2.** PCR genotyping of *Dgcr8*<sup>Δ/Δ</sup> NSC-derived iPSC clones isolated from three independent reprogramming experiments, related to Figure 2. Note that *Dgcr8*<sup>fllox</sup> alleles were completely disrupted in all analyzed iPSC clones. Arrow, *Dgcr8*<sup>fllox</sup>; arrow head, *Dgcr8*<sup>Δ</sup>.

**Figure S3.** Characterization of *Dgcr8*<sup>Δ/Δ</sup> iPSCs, related to Figure 3.

(A) The NSC-derived *Dgcr8*<sup>Δ/Δ</sup> iPSCs expressed pluripotency-associated markers (a) alkaline phosphatase, (b) SSEA-1 (red), and (c) NANOG; and (c') DAPI. Scale bars, 100 μm.

(B-C) Additional karyotypes of 40, XY *Dgcr8*<sup>Δ/Δ</sup> iPSCs.

(D) Characterization of transgene-free *Dgcr8*<sup>Δ/Δ</sup> iPSCs. (a) Bright field and (a') YFP. (b-d') The transgene-free *Dgcr8*<sup>Δ/Δ</sup> iPSCs expressed pluripotency-associated markers (b) alkaline phosphatase, (c) SSEA-1, and (d) NANOG; and (d') DAPI. Scale bars, 100 μm (white) and 50 μm (green).

Figure S1

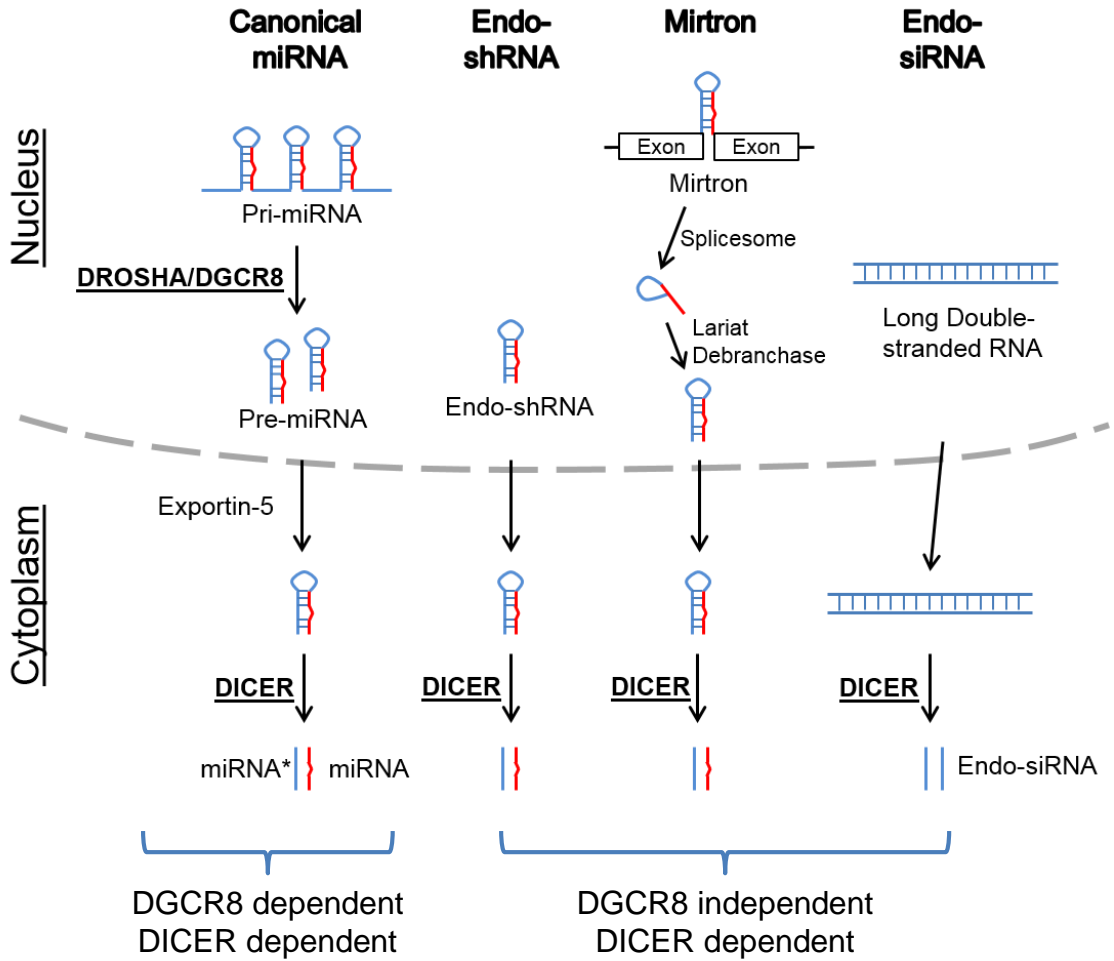

**Figure S2.**

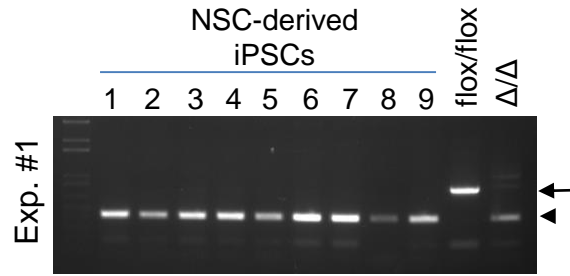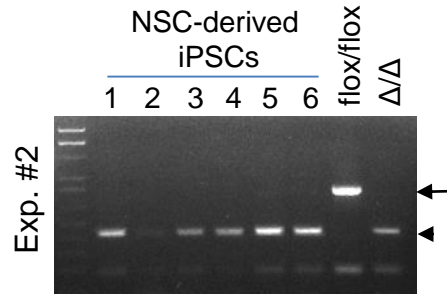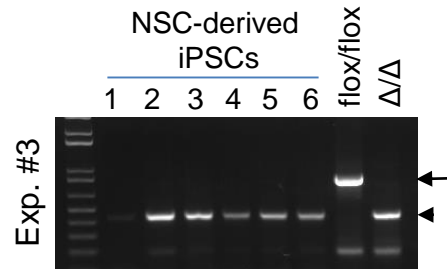

Figure S3.

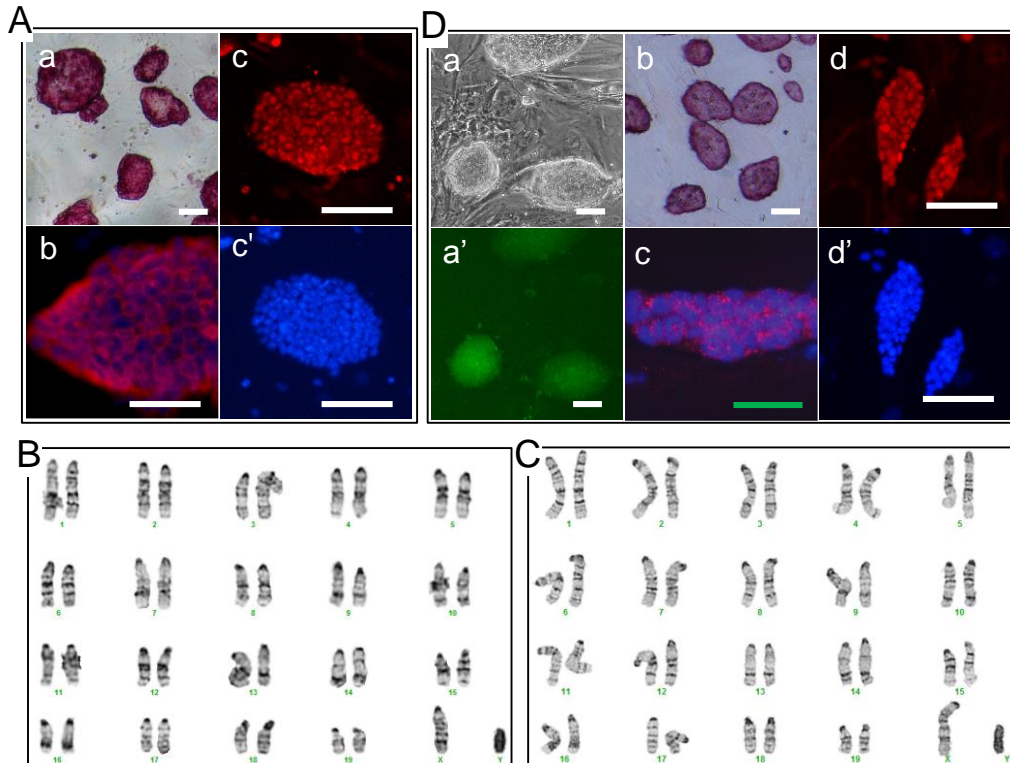

**Table S1.** Frequency of incomplete *Dgcr8* deletion in *Dgcr8*<sup>Δ/Δ</sup> fibroblast reprogramming, related to Figure 1.

|         | # of input fibroblasts | # of iPS colonies | # of <i>Dgcr8</i> <sup>Δ/Δ</sup> iPS colonies | # of incomplete deleted colonies | Reprog. efficiency (%)* |
|---------|------------------------|-------------------|-----------------------------------------------|----------------------------------|-------------------------|
| Exp. 1  | 50,000                 | 2                 | 2                                             | 0                                | 0.004                   |
| Exp. 2  | 50,000                 | 2                 | 2                                             | 0                                | 0.004                   |
| Exp. 3  | 50,000                 | 11                | 9                                             | 2                                | 0.018                   |
| Exp. 4  | 50,000                 | 6                 | 5                                             | 1                                | 0.010                   |
| Exp. 5  | 50,000                 | 1                 | 1                                             | 0                                | 0.002                   |
| Total   |                        | 22                | 19                                            | 3                                |                         |
| % total |                        |                   | 86.4                                          | 13.6                             |                         |

\*Reprogramming efficiency is determined by the ratio of *Dgcr8*<sup>Δ/Δ</sup> iPS colonies to input fibroblasts.

**Table S2.** Primer sequences, related to Figure 3 and 4.

| <b>Gene</b>          | <b>Primers</b>           | <b>Sequence</b>                                                                        |
|----------------------|--------------------------|----------------------------------------------------------------------------------------|
| Oct4                 | Oct4f<br>Oct4r           | 5' – AGC TGC TGA AGC AGA AGA GGA TCA – 3'<br>5' – TCT CAT TGT TGT CGG CTT CCT CCA – 3' |
| Sox2                 | Sox2f<br>Sox2r           | 5' – CAC ATG AAG GAG CAC CCG GAT TAT – 3'<br>5' – TCC GGG AAG CGT GTA CTT ATC CTT – 3' |
| Nanog                | Nanogf<br>Nanogr         | 5' – AAC CAA AGG ATG AAG TGC AAG CGG – 3'<br>5' – TCC AAG TTG GGT TGG TCC AAG TCT – 3' |
| Sox1                 | Sox1f<br>Sox1r           | 5' – CCA AGA TGC ACA ACT CGG AGA TCA – 3'<br>5' – ACT TGT CCT TCT TGA GCA GCG TCT – 3' |
| Fgf5                 | Fgf5f<br>Fgf5r           | 5' – ATA GCA GTT TCC AGT GGA GCC CTT – 3'<br>5' – ACT TAA CAC ACT GGC TTC GTG GGA – 3' |
| Krt18                | Krt18f<br>Krt18r         | 5' – ATC TGG AGT CAG AGC TGG CAC AAA – 3'<br>5' – TCC AGG GCA TCG TTG AGA CTG AAA – 3' |
| Brachyury            | Brach-f<br>Brach-r       | 5' – AGC TCT CCA ACC TAT GCG GAC AAT – 3'<br>5' – TGG TAC CAT TGC TCA CAG ACC AGA – 3' |
| Afp                  | Afp-f<br>Afp-r           | 5' – AGT TTC CAG AAC CTG CCG AGA GTT – 3'<br>5' – TGG AAG CAC TCC TCC TTG TTG TCA – 3' |
| Hnf4a                | Hnf4a-f<br>Hnf4a-r       | 5' – TTC GGC ATG GCC AAG ATT GAC AAC – 3'<br>5' – TTG GTG CCC ATG TGT TCT TGC ATC – 3' |
| Eomes                | Eomes-f<br>Eomes-r       | 5' – AAG GCT TCC GGG ACA ACT ACG ATT – 3'<br>5' – TGA GGC AAA GTG TTG ACA AAG GGC – 3' |
| Dgcr8                | Dgcr8f<br>Dgcr8r         | 5' – GTG GAT GAA GAG GCC TTG AA – 3'<br>5' – TCT TGG GAG CAC AGA GAC CT – 3'           |
| Oct4-tg              | hOct4-tg-F<br>F2A-R      | 5' – GCT CTC CCA TGC ATT CAA AC – 3'<br>5' – TTG GAC CTG GAT TTG ACT CTA C – 3'        |
| Sox2-tg              | hSox2F<br>hSox2R         | 5' – CAC ATG AAG GAG CAC CCG GAT TAT – 3'<br>5' – GTT CAT GTG CGC GTA ACT GTC CAT – 3' |
| b-actin              | bActin-f<br>bActin-r     | 5' – TTG CTG ACA GGA TGC AGA AGG AGA – 3'<br>5' – ACT CCT GCT TGC TGA TCC ACA TCT – 3' |
| Lentiviral transgene | hOct4-tg-F<br>hKlf4-tg-R | 5' – TGT ACT CCT CGG TCC CTT T – 3'<br>5' – TGC TTG ACG CAG TGT CTT – 3'               |
| Genomic control      | gDgcr8-P1f<br>gDgcr8-P1r | 5' – TTT CCA ACC CAA GTC AGC AGA T – 3'<br>5' – AGT GCA TGT GCC ATG CTG CCA – 3'       |
